# Supplementary material
Source: PubMed Central journal article supplement (PMC2783676)
Supplement: NIHMS151357-supplement-01.pdf [file NIHMS151357-supplement-01.pdf]

## **Biological performance of mussel-inspired adhesive in extrahepatic islet transplantation**

Carrie E. Brubaker<sup>a,b</sup>, Hermann Kissler<sup>c</sup>, Ling-jia Wang<sup>c</sup>, Dixon B. Kaufman<sup>b,c</sup>, Phillip B. Messersmith<sup>a,b,\*</sup>

<sup>a</sup> Biomedical Engineering Department, Northwestern University, Evanston, Illinois 60208, USA

<sup>b</sup> Institute for BioNanotechnology in Medicine, Northwestern University, Chicago, Illinois 60611, USA

<sup>c</sup> Department of Surgery, Division of Organ Transplantation, Feinberg School of Medicine, Northwestern University, Chicago, Illinois 60611, USA

\* Corresponding author. Fax: +1 847 491 4928

*E-mail address:* philm@northwestern.edu.

## **SUPPLEMENTARY INFORMATION**

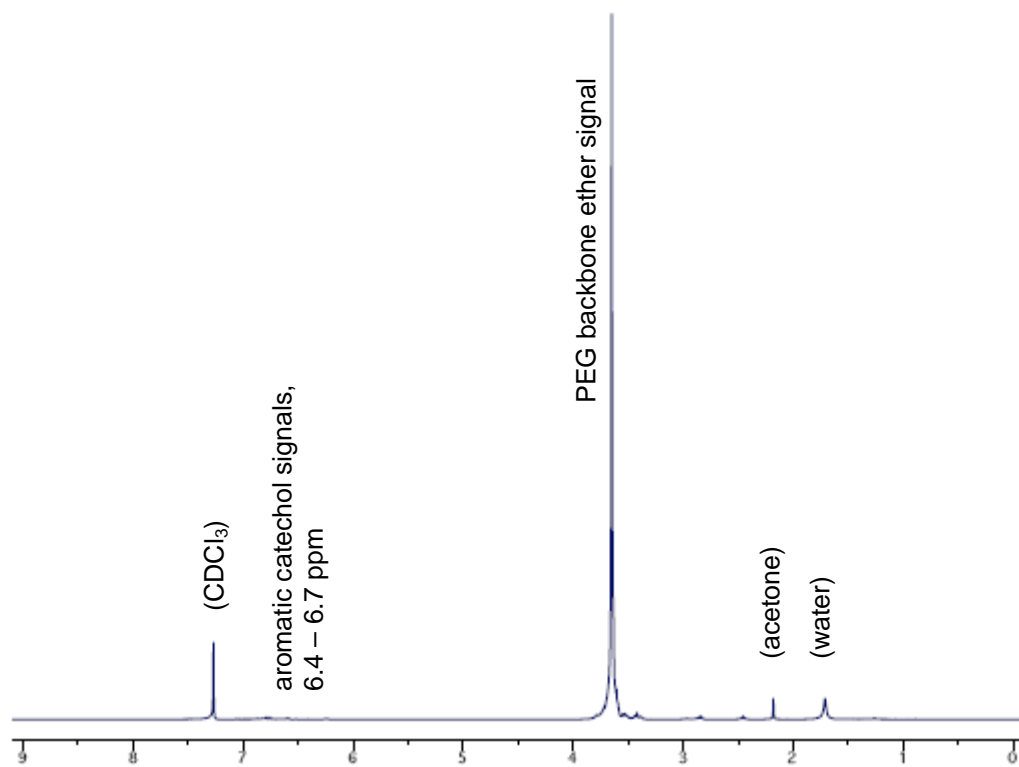

**Supplementary Fig. 1.** <sup>1</sup>H-NMR (500 MHz, CDCl<sub>3</sub>) of mussel-mimetic cPEG adhesive precursor polymer.

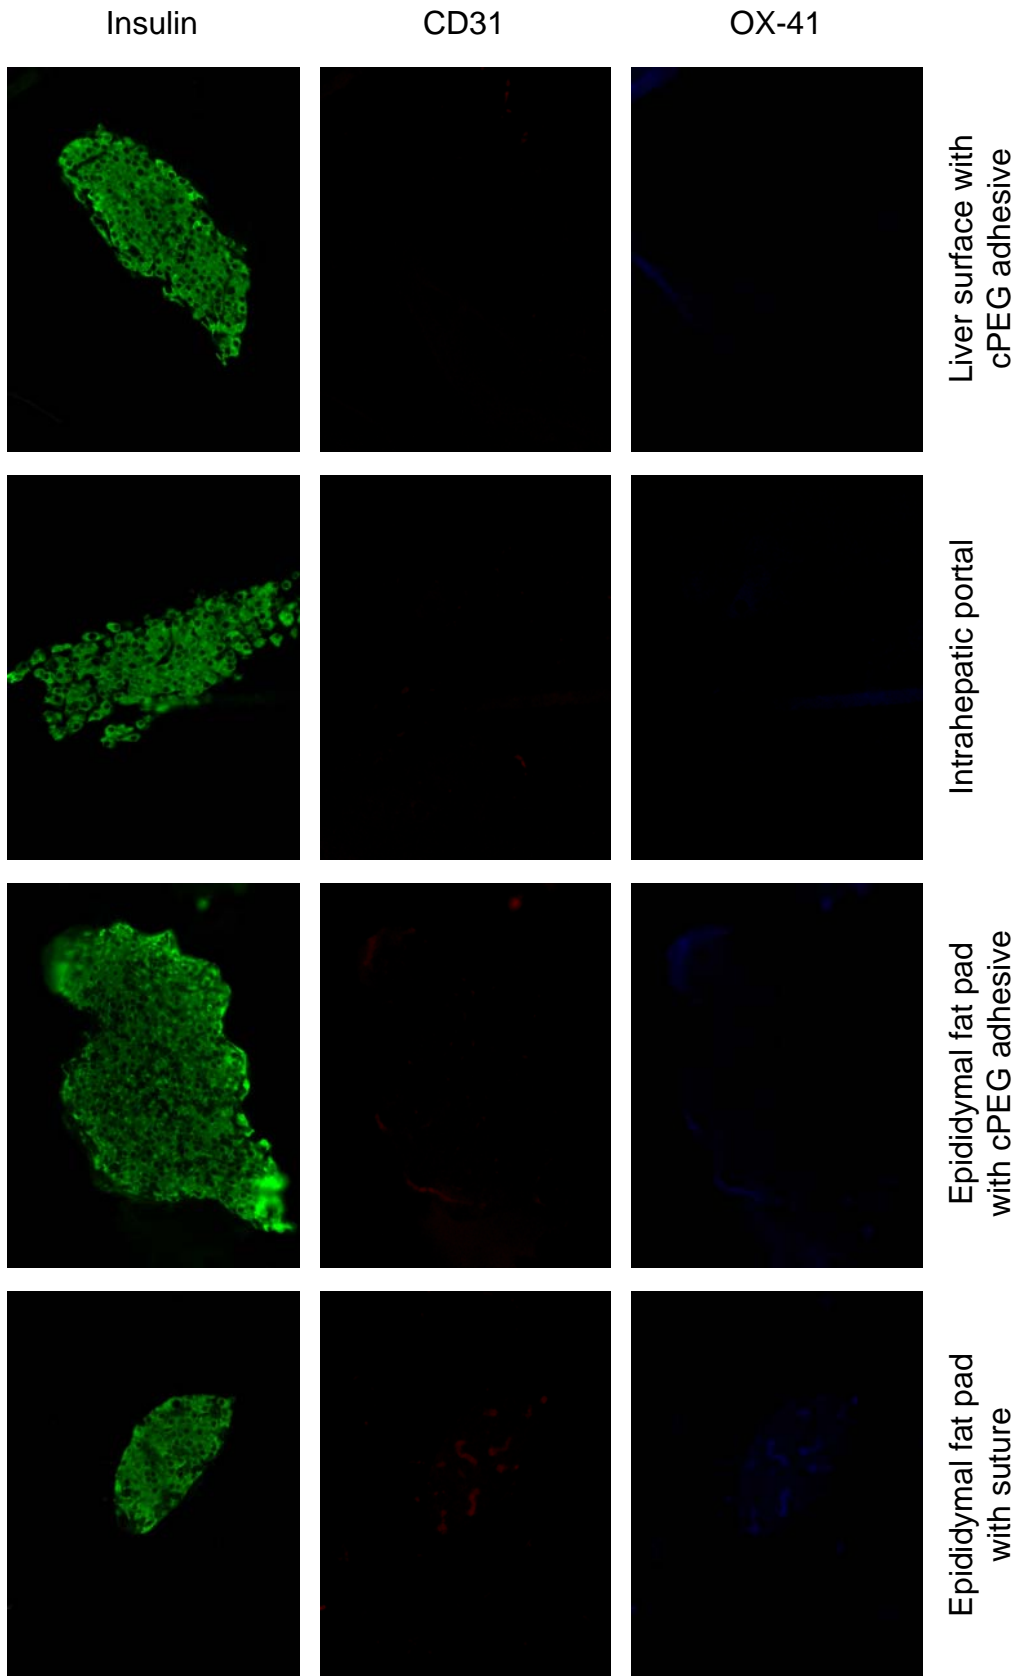

**Supplementary Fig. 2.** Single-channel fluorescence images following triple-stain immunohistochemical identification of insulin (green, functional islet marker), CD31 (red, endothelial cell marker), and OX-41 (blue, macrophage marker).
